# Supplementary material for: Reduction of cardiac iron overload by optimising iron chelation therapy in transfusion dependent thalassaemia using cardiac T2* MRI: a quality improvement project from Pakistan
Source: HighWire-hosted journal article supplement (doi:10.1136/archdischild-2020-319203), 2020-09-29
Supplement: archdischild-2020-319203supp003_data_supplement.pdf [file archdischild-2020-319203supp003_data_supplement.pdf]

| Variables                           | Post intervention standardization of chelation therapy |                               |                                 | Total<br>n |
|-------------------------------------|--------------------------------------------------------|-------------------------------|---------------------------------|------------|
|                                     | Chelation<br>increased/started<br>n (%)                | Chelation<br>reduced<br>n (%) | Chelation<br>unchanged<br>n (%) |            |
| <b>Cardiac T2* CMR values</b>       |                                                        |                               |                                 |            |
| <10 msec                            | 51 (51)                                                | 0                             | 0                               | 51         |
| 10-15 msec                          | 15 (15)                                                | 1 (1)                         | 1 (1)                           | 17         |
| 15-20 msec                          | 4 (4)                                                  | 1 (1)                         | 0                               | 5          |
| >20 msec                            | 19 (19)                                                | 4 (4)                         | 4 (4)                           | 27         |
| Total                               | 89 (89)                                                | 6 (6)                         | 5 (5)                           | 100        |
| <b>Adverse event severity level</b> |                                                        |                               |                                 |            |
| Severity level 1                    | 18 (18)                                                | 0                             | 0                               | 18         |
| Severity level 2                    | 7 (7)                                                  | 0                             | 0                               | 7          |
| Severity level 3                    | 21 (21)                                                | 2 (2)                         | 0                               | 23         |
| Total                               | 46 (96)                                                | 2(4)                          | 0                               | 48         |

Supplementary Table 1: T2\* CMR values and adverse event severity level in patients with post intervention standardization of chelation therapy (n=100).

| Baseline T2* CMR<br>(msec) | Baseline Ferritin (ng/ml) |              | Total    |
|----------------------------|---------------------------|--------------|----------|
|                            | <2500 (n, %)              | >2500 (n, %) |          |
| <10                        | 2 (4%)                    | 49 (96%)     | 51 (51%) |
| 10-15                      | 2 (12%)                   | 15 (88%)     | 17 (17%) |
| 15-20                      | 0                         | 5 (100%)     | 5 (5%)   |
| >20                        | 3 (11%)                   | 24 (89%)     | 27 (27%) |
| <b>Total</b>               | 7 (7%)                    | 93 (93%)     | 100      |

**Supplementary Table 2:** Baseline serum ferritin levels in patients with severe, moderate, mild and no cardiac overload (n=100).
