# Supplementary figures and images for: Reduction of cardiac iron overload by optimising iron chelation therapy in transfusion dependent thalassaemia using cardiac T2* MRI: a quality improvement project from Pakistan
Source: HighWire-hosted journal article supplement (doi:10.1136/archdischild-2020-319203), 2020-09-29

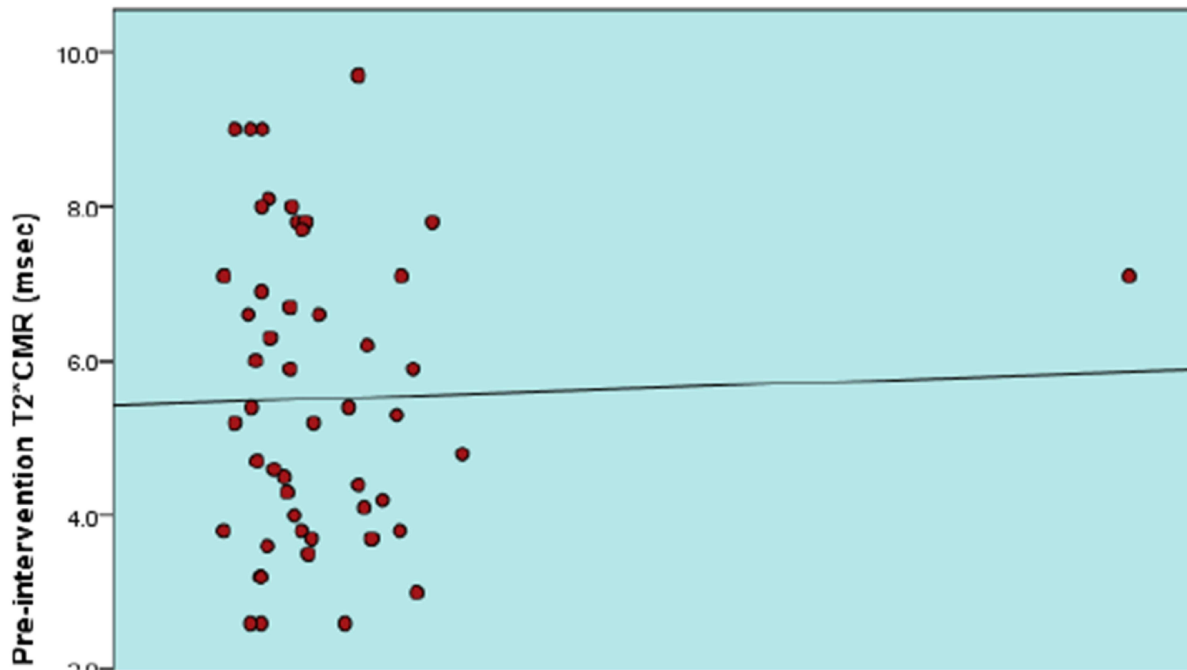

Supplement: archdischild-2020-319203supp005_data_supplement.pdf [file archdischild-2020-319203supp005_data_supplement.pdf]
